# Supplementary material
Source: PubMed Central journal article supplement (PMC6758648)
Supplement: mcz064_suppl_supplementary_data_file_2.pdf [file mcz064_suppl_supplementary_data_file_2.pdf]

# **International Code for Phytolith Nomenclature (ICPN) 2.0**

*International Committee for Phytolith Taxonomy (ICPT)*  
*(Katharina Neumann, Caroline Strömberg, Terry Ball,*  
*Rosa Maria Albert, Luc Vrydaghs, Linda Scott Cummings)*

## **Supplementary Information: Glossary of Descriptive Terms**

## General Suggestions for Using this Glossary

- 1) These terms are intended to be used for describing phytolith morphologies and should not be confused with morphotype names. However, a descriptor can be used as part of name for a new morphotype as per ICPN 2.0 naming and describing directions.
- 2) It is often helpful to combine descriptors to indicate the range, transitional forms, and plasticity of shapes, ornamentations, textures or margins when describing phytoliths. For example, descriptions such as “processes are echinate to baculate,” “surface texture is granulate to nodulate,” or “margins are dentate to clavate” may be useful in describing a particular phytolith type and the variance within the type or even a single phytolith. This can also help ameliorate problems with the naturally subjective nature of descriptions.
- 3) Many of the term definitions below are accompanied by a list of similar terms that researchers may find useful in describing a particular phytolith type and its range of variance.
- 4) Because a given term/descriptor may encompass a range of forms (see photos below), it is often helpful to add explanatory text to descriptions. For example, a phytolith with “papillar” processes/ornamentation encompasses both forms with one large process or several processes.
- 5) Phytoliths are three-dimensional and they should be described as such whenever possible.
- 6) These terms should be used only for describing original shape and texture, not for characteristics associated with secondary processes such as dissolution, breakage, or diagenetic alteration.
- 7) An “Alphabetical List of All Descriptors” is found at the end of the Glossary.
- 8) When terms in this glossary are not adequate to describe a particular phytolith, consider consulting the sources listed at the end of the glossary for additional botanical Latin terms that may be useful, consulting Stearn’s Botanical Latin (Stearn 2013) first.

## Descriptors

Data Base source or contributors name are listed under the images.

### Shape Descriptors, 3-Dimensional

**acicular:** needle shaped, long and narrow, tapering to an acute apex, cf. acute (2-D)

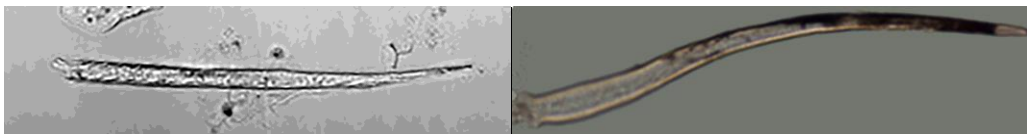

Oman Data Base

PhytCore Data Base

**amoeboid:** having an irregular shape with several rounded projections (projections are small relative to the body overall); cf. brachiata (2-D)

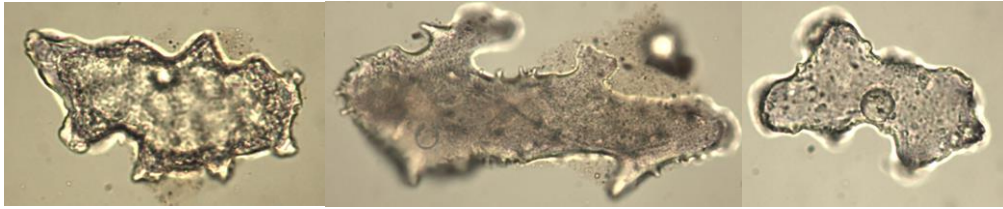

Katharina Neumann

Katharina Neumann

Katharina Neumann

**bulbous:** being swollen, rounded, ballooned, or bulging at some point; cf. claviform.

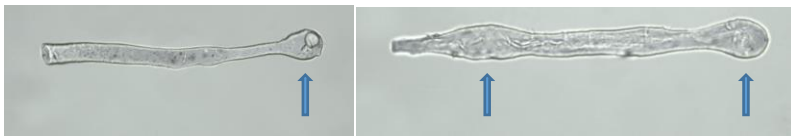

Katharina Neumann

Katharina Neumann

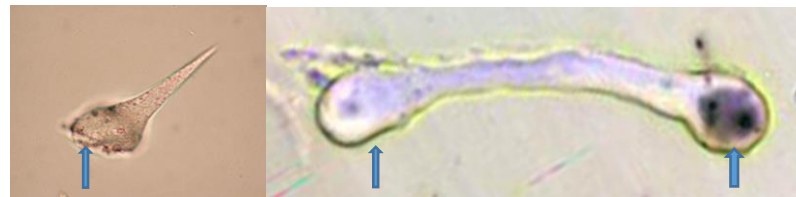

Caroline Strömberg

PhytCore Data Base

**carinate:** keel shaped or having a keel shaped ridge

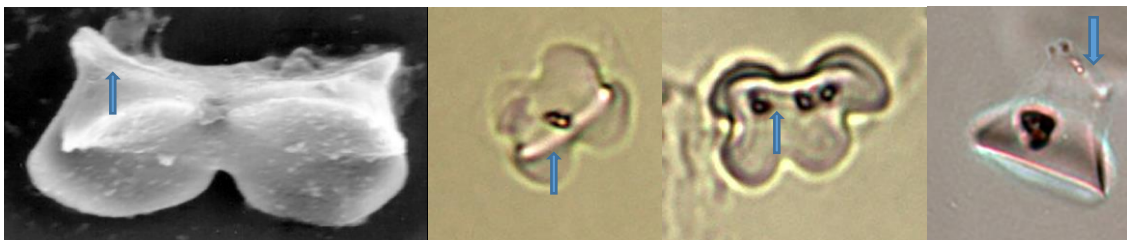

PhytCore Data Base

Katharina Neumann

Katharina Neumann

Caroline Strömberg

**cavate:** hollowed out; cf. conical

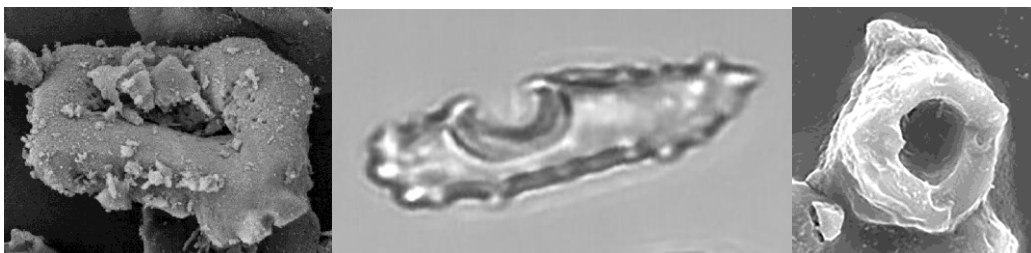

Katharina Neumann

Terry Ball

Doreen Bowdery

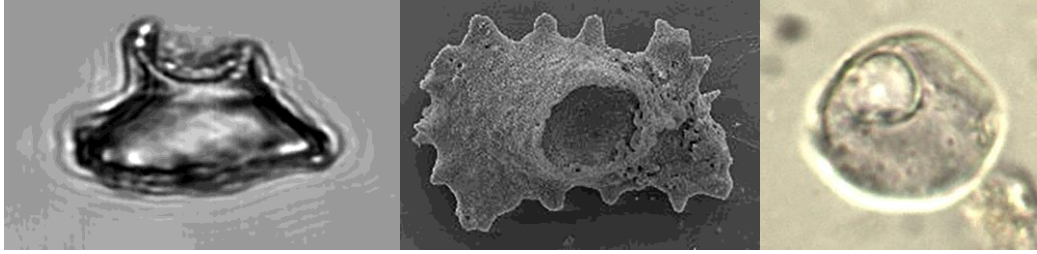

Terry Ball

PhytCore Data Base

Katharina Neumann

**claviform:** club shaped; gradually thickening from a slender end to a wider, usually rounded end; cf. bulbous, flabellate (2-D)

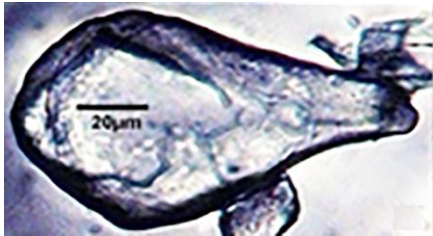

Sheikh Abdul Shakoor

**conical:** cone-shaped, widest at the base and tapering to the apex from a more or less flat base, apex may be acute, truncated, rounded, or cavate

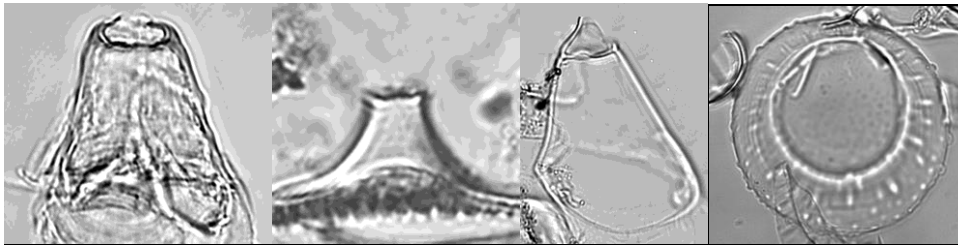

Oman Data Base

Oman Data Base

Oman Data Base

Oman Data Base

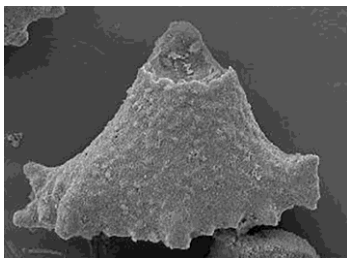

PhytCore Data Base

**cylindrical:** circular to ellipsoidal in cross section, cylinder-shaped; cf. elongate (2-D)

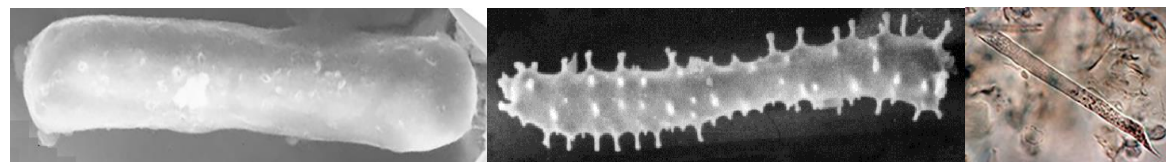

Doreen Bowdery

PhytCore Data Base

Caroline Strömberg

**ellipsoidal:** similar to spheroidal but stretched or elongated along one axis; forms ellipses or circles in cross section; cf. spheroidal, oblong (2-D)

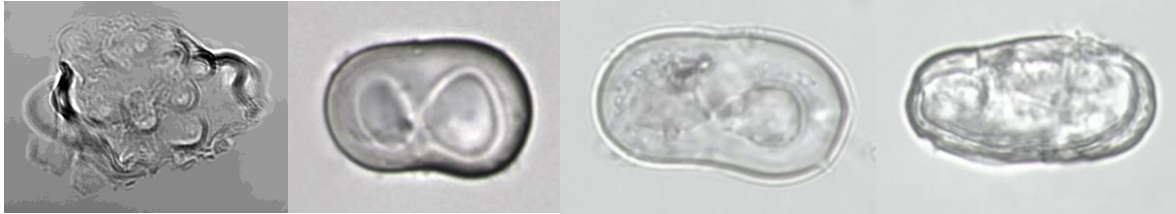

Oman Data Base

Katharina Neumann

Katharina Neumann

Katharina Neumann

**nodular:** composed of rounded, somewhat irregular nodules or spheroids; cf. nodulate (rounded nodules on the surface)

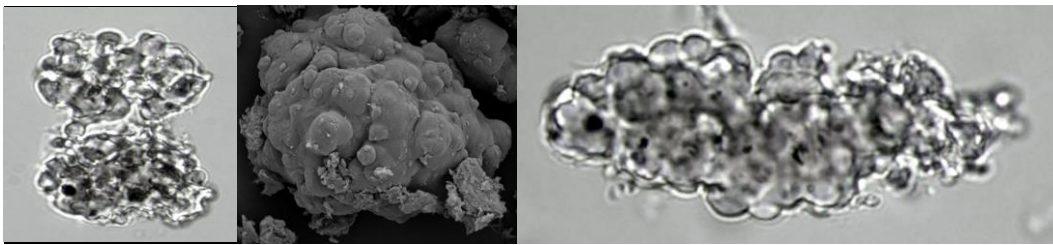

Katharina Neumann

Katharina Neumann

Katharina Neumann

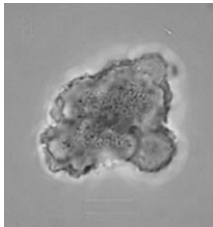

Caroline Strömberg

**polyhedral:** having several distinctive, flat or concave faces, cf. polygonal (2-D), facetate (2-D)

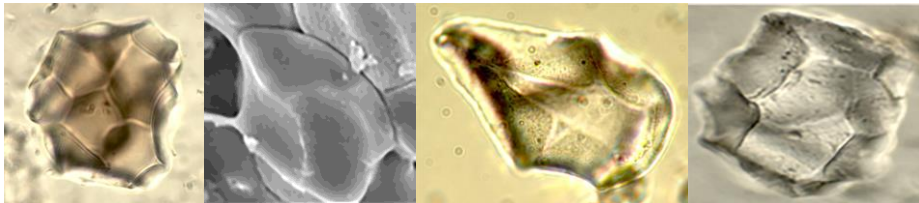

Katharina Neumann

Doreen Bowdery

Katharina Neuman

Katharina Neumann

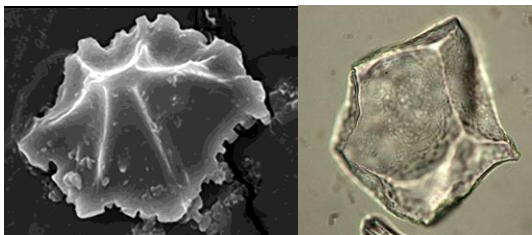

Doreen Bowdery

Katharina Neumann



**prismatic:** having sides that are parallelograms, polygonal in cross section; cf. polyhedral (3-D);

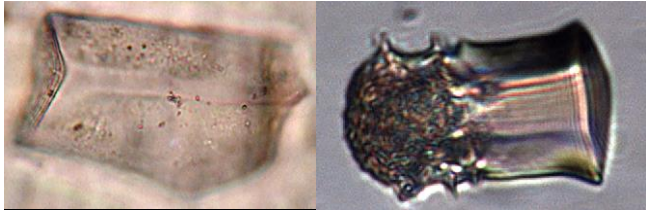

Aline Emery-Barbier

Barbara Eichhorn

**spheroidal:** globe shaped, spherical or nearly so in 3 dimensions, circular or nearly so in cross section; cf. ellipsoid (3-D), circular (2-D)

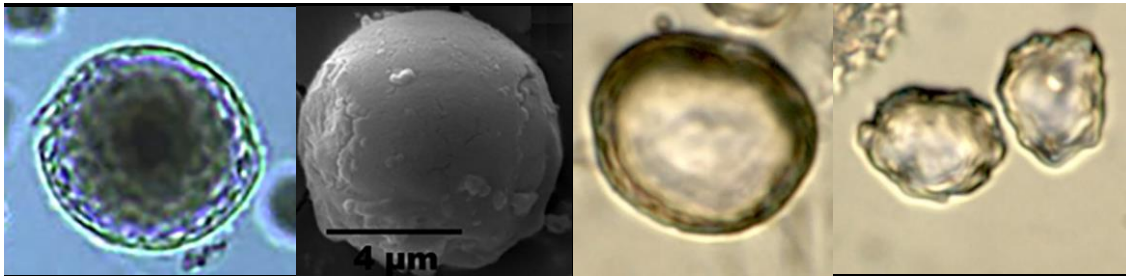

PhytCore Data Base

Sheikh Abdul Shakoor

Katharina Neumann

Katharina Neumann

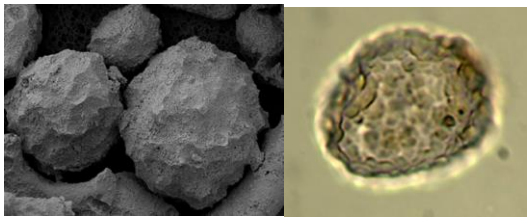

Katharina Neumann

Katharina Neumann

**tabular:** relatively thin, having two parallel flat faces (like a table top)

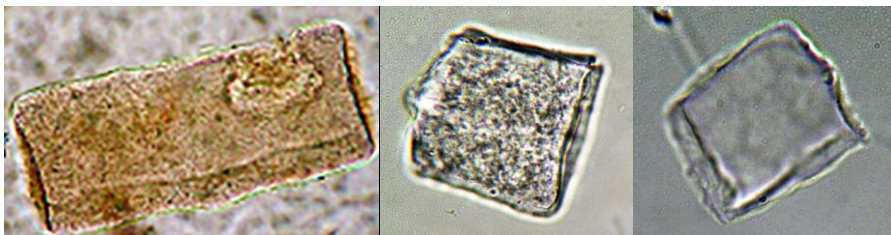

Aline Emery-Barbier

Zsuzsa Lisztes-Szabó

Zsuzsa Lisztes-Szabó

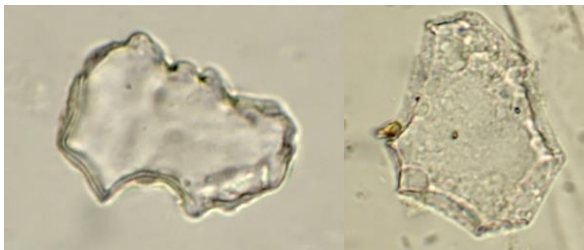

Katharina Neumann

Katharina Neumann

## Shape Descriptors, 2-Dimensional

**acute:** pointed, narrowing to a sharp apex with an angle of less than 90°; cf. acicular (3-D)

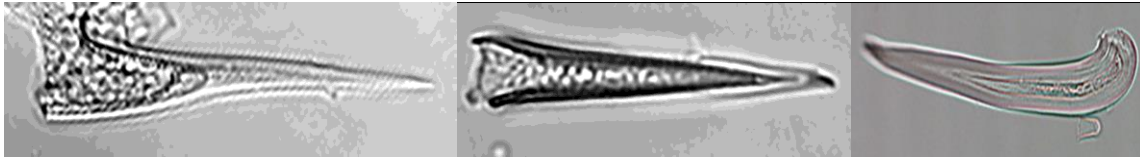

Oman Data Base

Oman Data Base

PhytCore Data Base

**arcuate:** curved like a bow; cf. reniform, uncinata

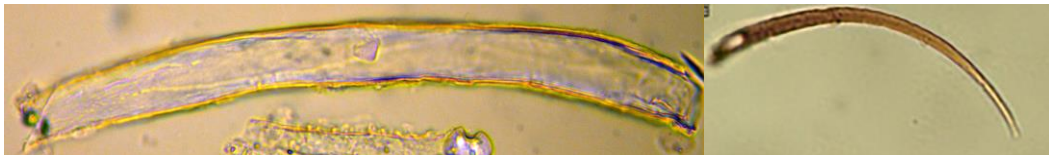

Katharina Neumann

Madison Pearce

**brachiate:** branched; cf. amoeboid (3-D)

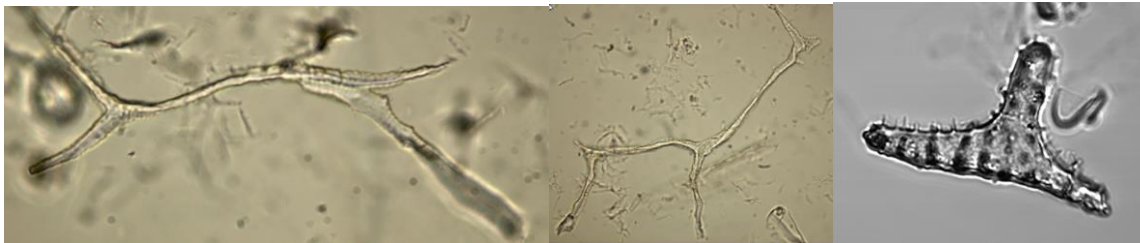

Katharina Neumann

Katharina Neumann

Oman Data Base

**circular:** round, circle shaped or nearly so; cf. spheroid (3-D)

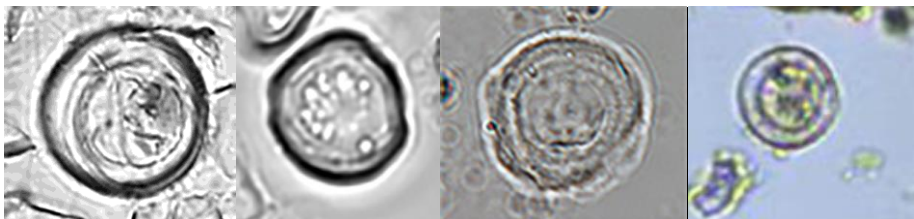

Oman Data Base

Oman Data Base

PhytCore Data Base

PhytCore Data Base

**elongated:** longer than wide; specifically, more than twice as long as wide; cf. cylindrical (3-D), oval (2-D), ovate (2-D), rectangular (2-D)

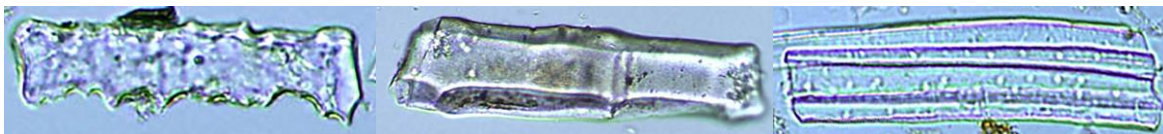

PhytCore Data Base

PhytCore Data Base

PhytCore Data Base

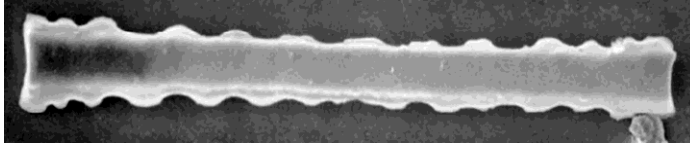

PhytCore Data Base

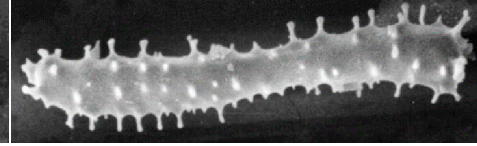

PhytCore Data Base

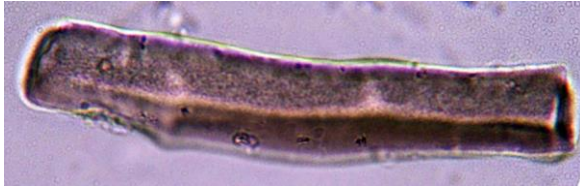

Zsuzsa Lisztes-Szabó

**flabellate:** fan-shaped; cf. clavate (3-D)

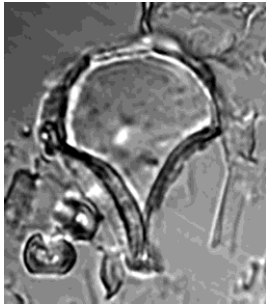

Oman Data Base

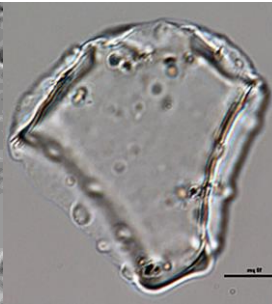

Oman Data Base

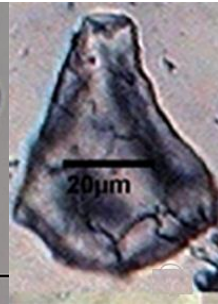

Sheikh Abdul Shakoor

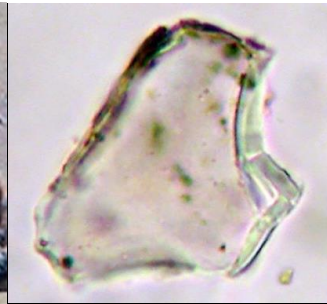

Aline Emery-Barbier

**fusiform:** spindle-shaped, swollen in the middle and narrowing towards the ends, either symmetrically or as in a spindle used in textiles, asymmetrically, that is, narrowing more abruptly on one end.

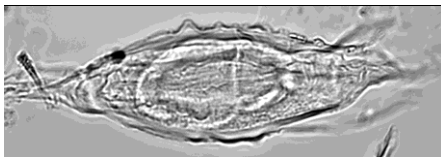

Oman Data Base

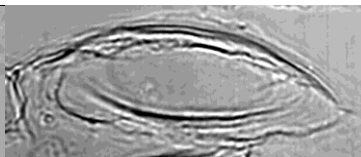

Oman Data Base

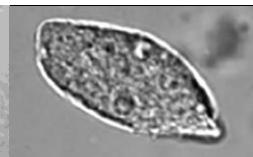

Laurent Bremond

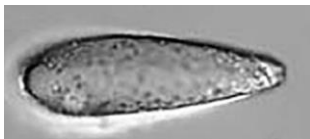

Doris Barboni

**geniculate:** bent at an angle, knee-like.

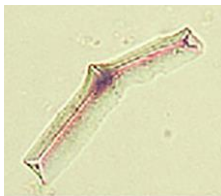

Katharina Neumann

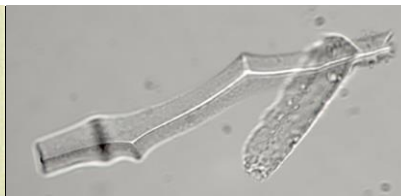

Katharina Neumann

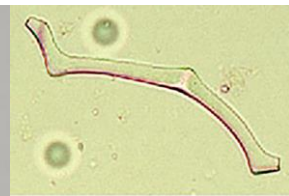

Katharina Neumann



**lobate:** having two or more lobes, that is, wider rounded parts separated by a castula (waist)

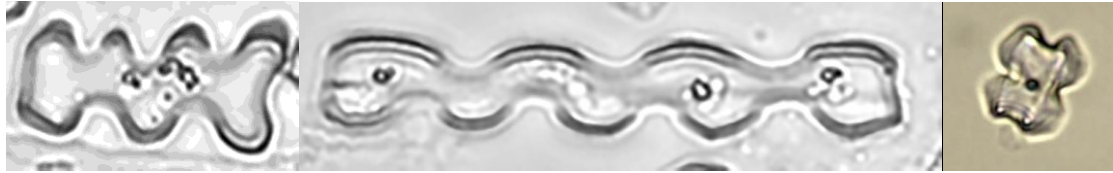

Oman Data Base

Oman Data Base

Katharina Neumann

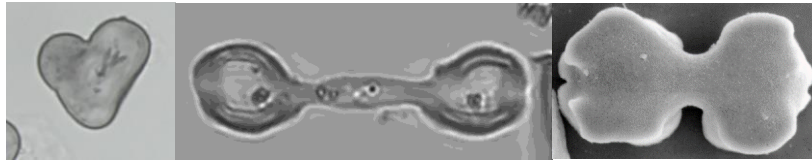

Katharina Neumann

Oman Data Base

PhytCore Data Base

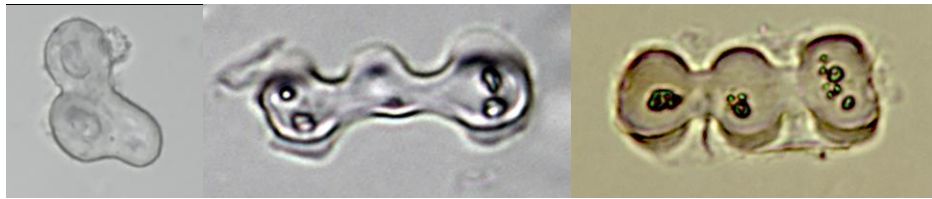

Katharina Neumann

Katharina Neumann

Katharina Neumann

**oblong:** rectangular/elongated shape but with rounded corners or ends; cf. ellipsoidal (3-D)

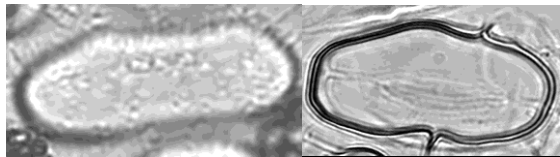

Oman Data Base

Oman Data Base

**ovate:** egg-shaped, elliptic with one end broader than the other; cf. oblong (2-D), reniform (2-D)

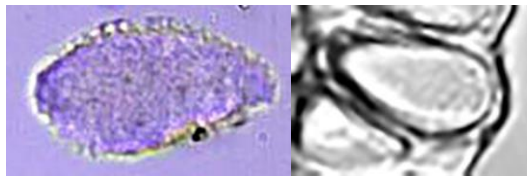

PhytCore Data Base

Oman Data Base

**polygonal:** having three or more straight sides, as in triangles, pentagons, hexagons, etc.; cf. polyhedral (3-D)

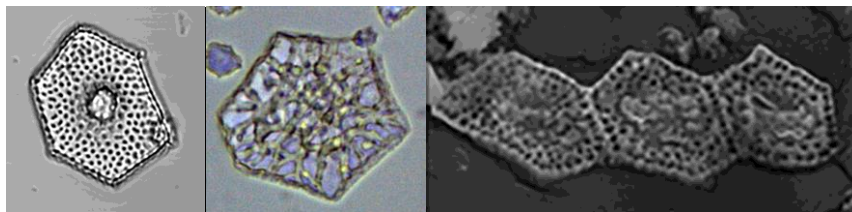

Oman Data Base

Barbara Eichhorn

Doreen Bowdery

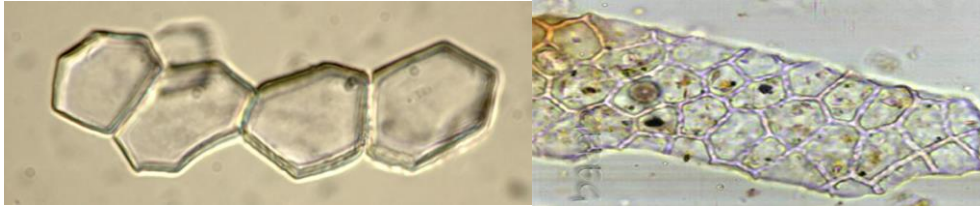

Katharina Neumann

PhytCore Data Base

**rectangular:** having four  $\pm$  straight sides, of which two opposite sides are longer than the other ones, with four angles of  $\pm 90^\circ$ ; cf. elongated

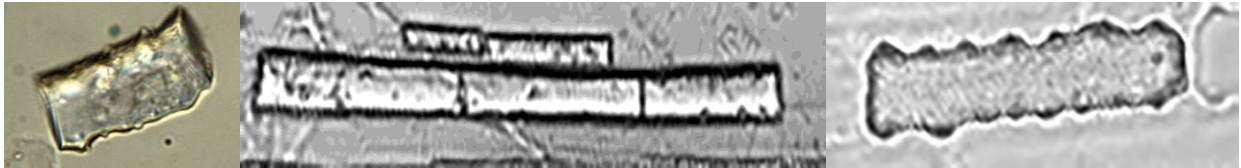

Katharina Neumann

Oman Data Base

Oman Data Base

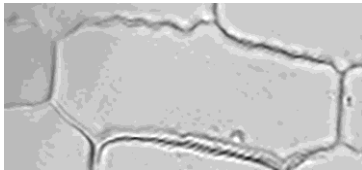

Oman Data Base

**reniform:** kidney-shaped, oblong with one concave and one convex side; cf. oblong

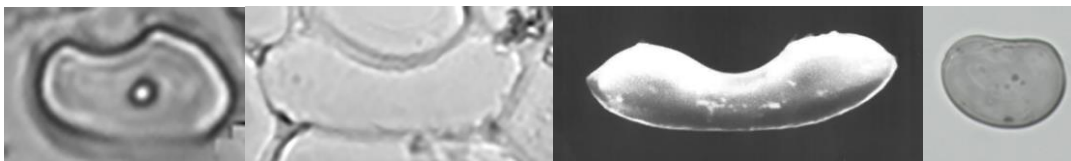

Oman Data Base

Oman Data Base

Doreen Bowdery

Katharina Neumann

**trapeziform:** having four sides, two being parallel, and the other two not parallel

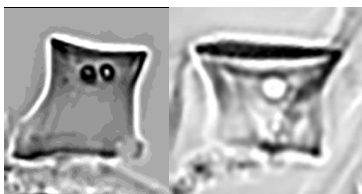

Oman Data Base

Oman Data Base

**uncinate:** hook-shaped

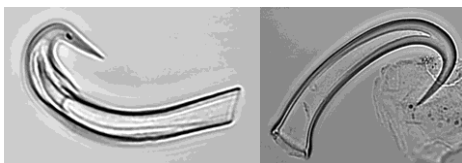

Oman Data Base

Oman Data Base

## Margin Descriptors

**castellate:** having a pattern of square to rectangular projections along the margins, typically broader (along the main axis of the main body) than tall; cf. columnar,

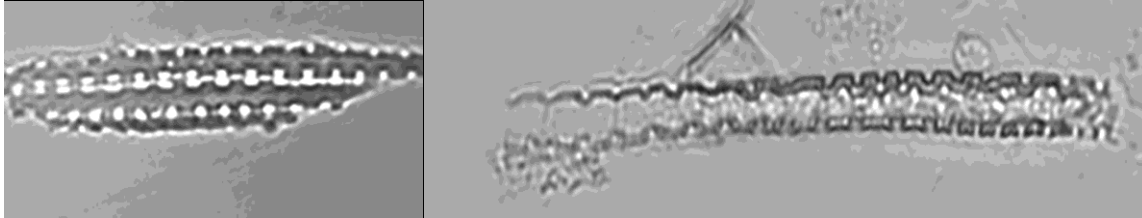

Oman Data Base

Oman Data Base

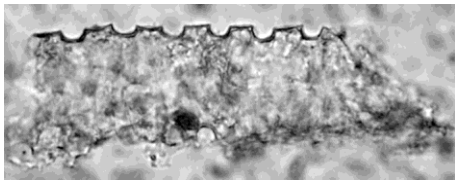

Aline Emery-Barbier

**clavate:** having a pattern of club-shaped projections (thicker at distal end, constricted proximally) along the margins; cf. dentate, baculate

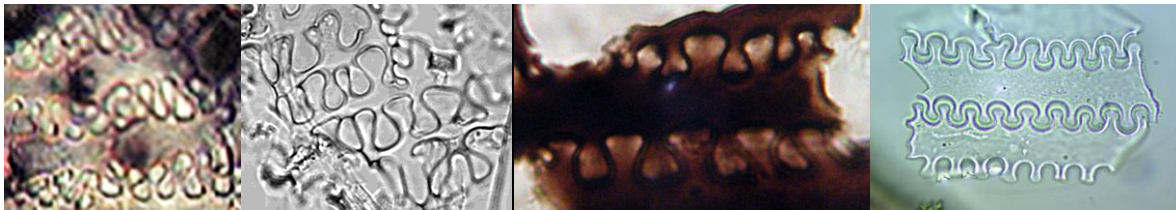

Sheikh Abdul Shakoor

Oman Data Base

Aline Emery-Barbier

Zsuzsa Lisztes-Szabó

**columnar:** having a pattern of straight-sided, square to rounded, strap like projections along the margins that are longer than broad; cf. castellate, clavate, dentate

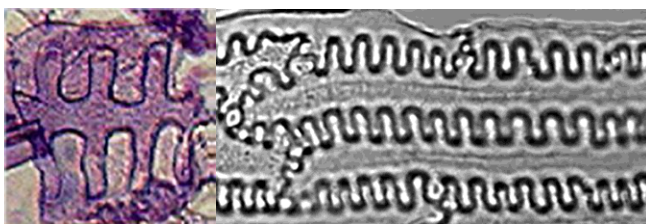

Sheikh Abdul Shakoor

Oman Data Base

**crenate:** having rounded teeth; cf. sinuate

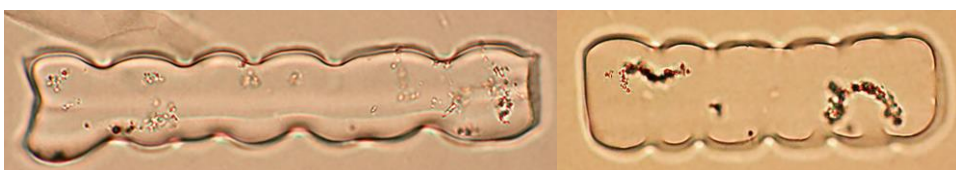

Caroline Strömberg

Caroline Strömberg



**dendritic:** having branched projections along the margins; cf. dentate, echinate

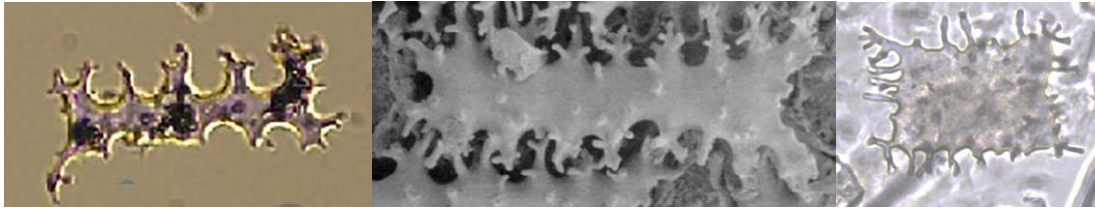

PhytCore Data Base

Terry Ball

Katharina Neumann

**dentate:** having “teeth,” that is, narrow, often acute processes with concave or straight sides along the margins; cf. clavate, columnar, echinate

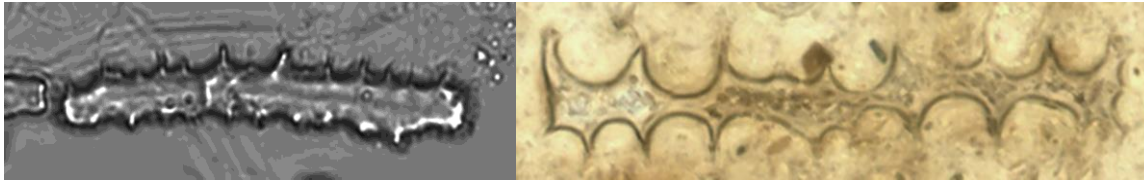

Oman Data Base

Luc Vrydaghs

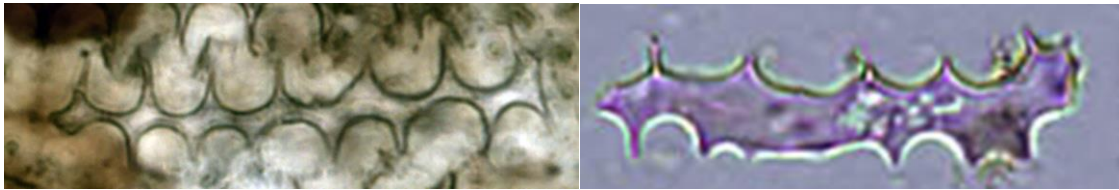

Luc Vrydaghs

PhytCore Data Base

**entire:** having smooth margins, without any projections, indentations, or unevenness

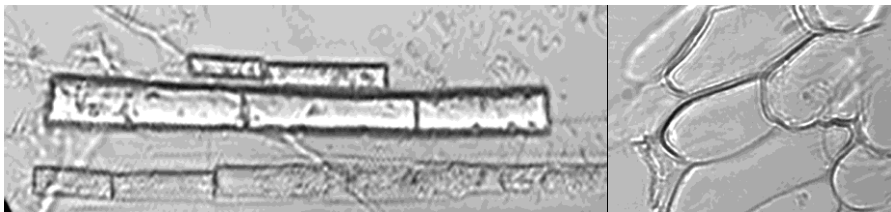

Oman Data Base

Oman Data Base

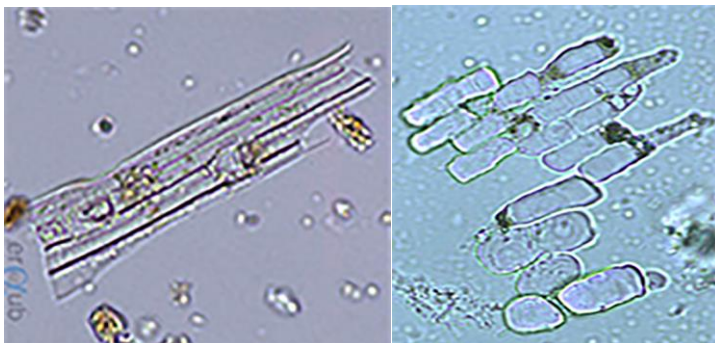

PhytCore Data Base

PhytCore Data Base



**sinuate:** having a margin with alternating concavities and convexities; cf. clavate, columnar, crenate, dentate

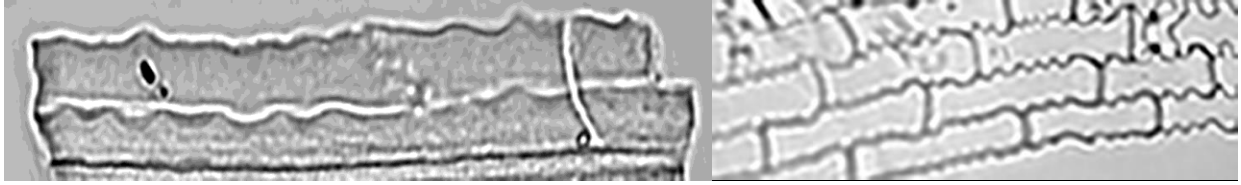

Oman Data Base

Oman Data Base

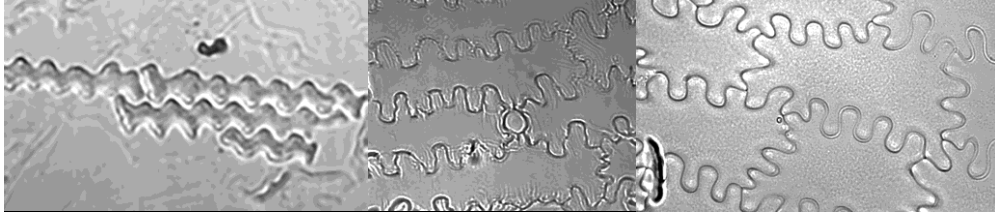

Oman Data Base

Oman Data Base

Oman Data Base

**velloate:** having pinched point(s) along the margin (corresponding to an intersection between adjacent cells in tissue).

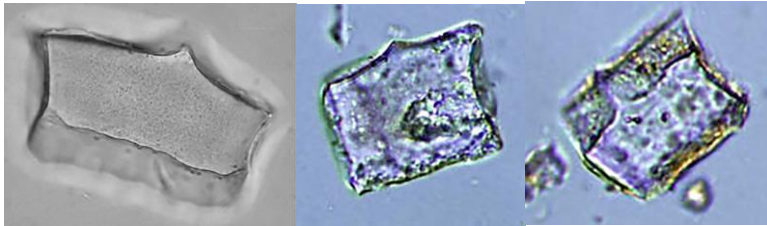

Caroline Strömberg

PhytCore Data Base

PhytCore Data Base

## Surface Texture and Ornamentation Descriptors

**annulate:** surface shaped into alternate, evenly spaced and sized ridges and furrows in a more or less regular, (sub)parallel pattern; cf. helical, plicate, rugose, striate

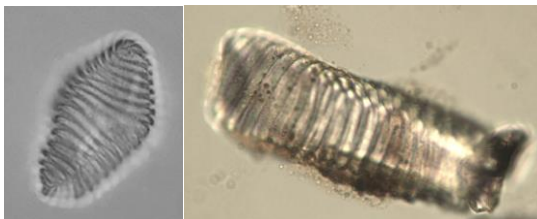

Caroline Strömberg

Katharina Neumann

**areolate:** surface divided into irregular spaces delimited by narrow ridges; cf. facetate, which has much larger, angular, and regular spaces in between ridges

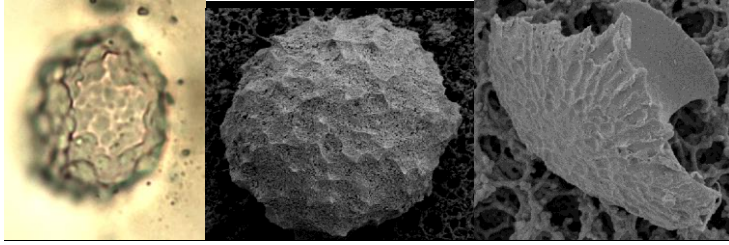

Katharina Neumann

Katharina Neumann

Barbara Eichhorn

**baculate:** having straight-sided cylindrical or pillar-like processes that are longer than broad; cf. echinate, pilate

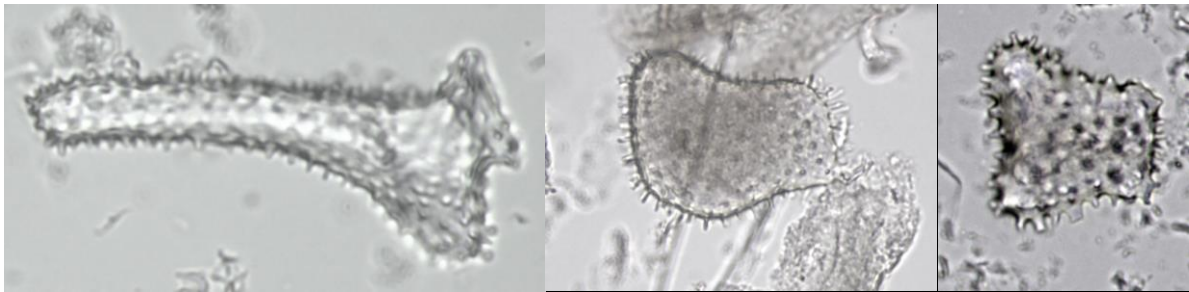

Veronica Collura

Veronica Collura

Katharina Neumann

**compound:** structure consisting of two more simple parts in combination, for example larger processes covered in small processes.

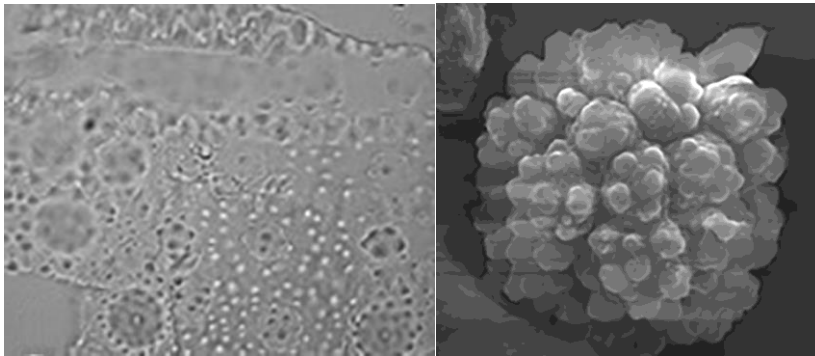

Caroline Strömberg

Doreen Bowdery

**echinate:** having spiny, conical, more or less sharply acute projections; cf. tuberculate, baculate

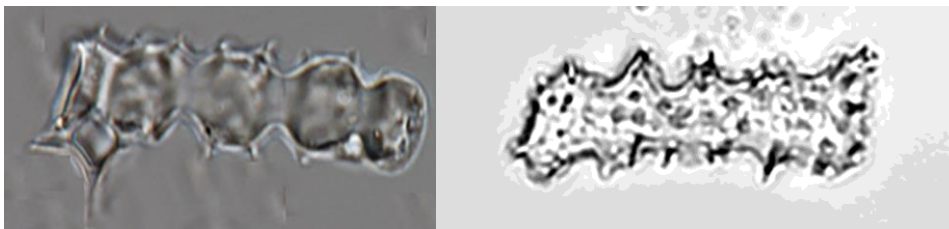

PhytCore Data Base

Oman Data Base

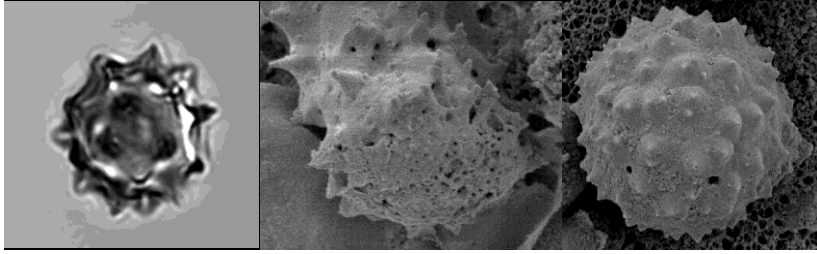

Oman Data Base

Barbara Eichhorn

Katharina Neumann

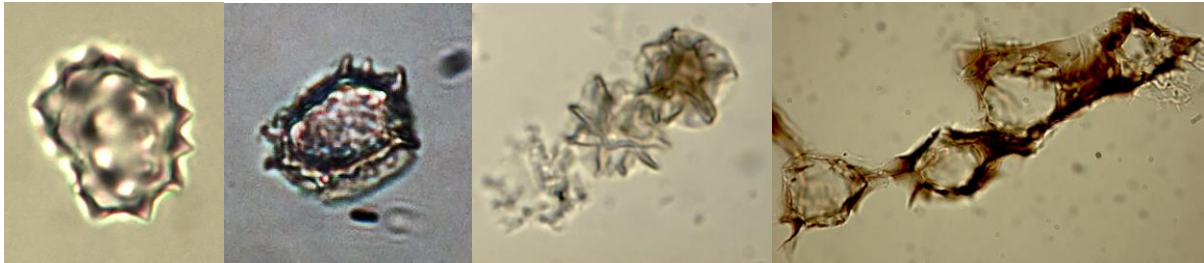

Katharina Neumann

Barbara Eichhorn

Katharina Neumann

Katharina Neumann

**facetate:** having several flat to slightly concave areas forming the surface; cf. areolate, ruminata

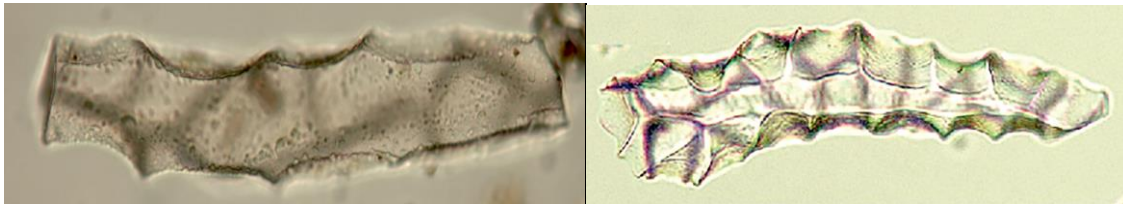

Katharina Neumann

Aline Garnier

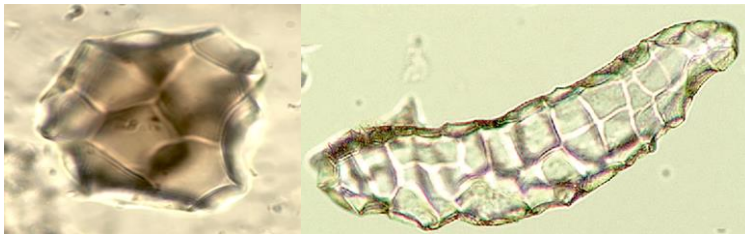

Katharina Neumann

Aline Garnier

**gibbate:** having short, knob like processes that are more or less circular, oval or spindle-shaped in cross section and having flat or rounded ends, typically broader than long; cf. pilate, baculate

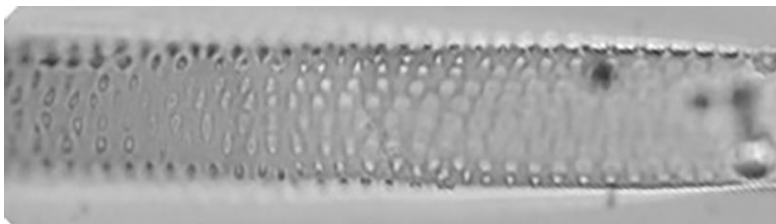

Caroline Strömberg



**granulate:** having fine grains on the surface, creating a grainy texture; cf. nodulate, scrobiculate, granular (3-D)

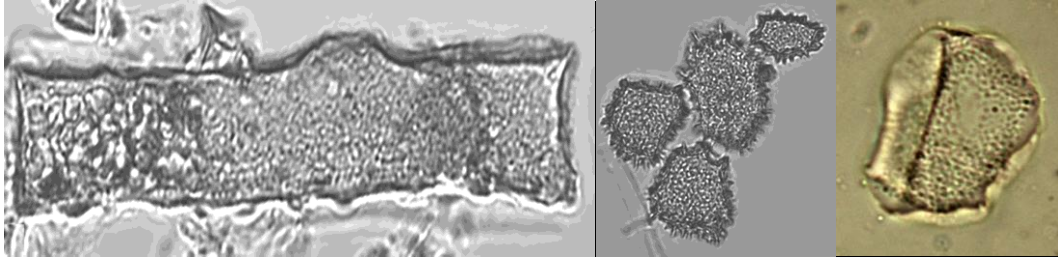

Oman Data Base

Oman Data Base

Katharina Neumann

**helical:** having ridges that are arranged spirally around a typically cylindrical or rounded body, cf. annulate

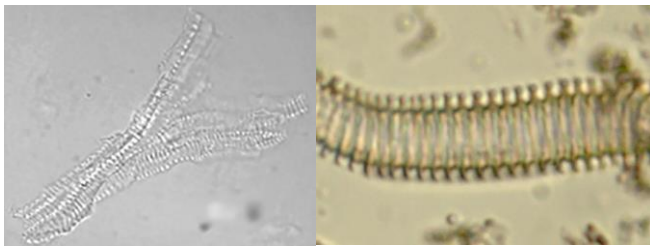

Caroline Strömberg

Katharina Neumann

**nodulate:** having rounded, somewhat irregular, nodules or spheroids on the surface; cf. nodular (3-D), verrucate, papillar, tuberculate

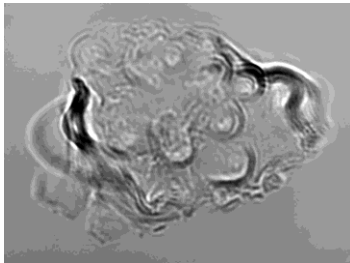

Oman Data Base

**papillar:** having one or more rounded, nipple-like processes on a planar surface; cf. echinate, tuberculate, nodulate, nodular (3-D)

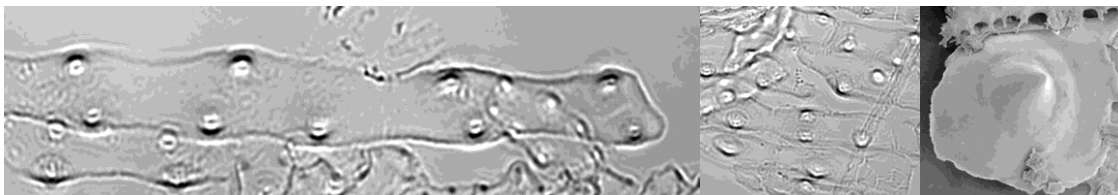

Oman Data Base

Oman Data Base

Terry Ball



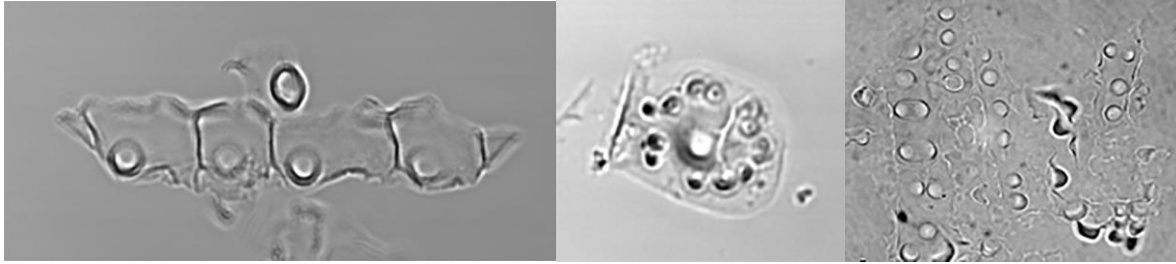

Oman Data Base

Oman Data Base

PhytCore Data Base

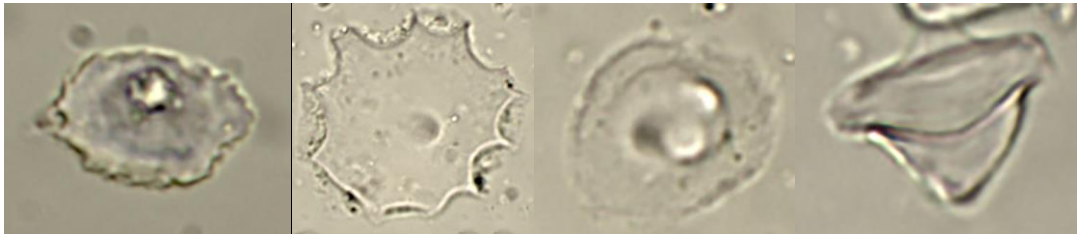

Katharina Neumann

Katharina Neumann

Katharina Neumann

Katharina Neumann

**pilate:** having processes with concavities along the ends, tops or sides

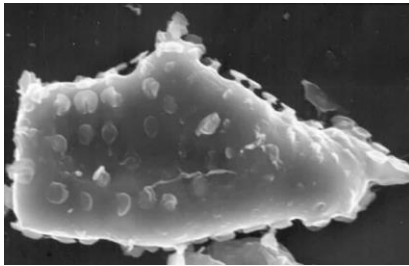

Doreen Bowdery

**plicate:** crumpled, wrinkled, or irregularly folded surface; cf. rugose

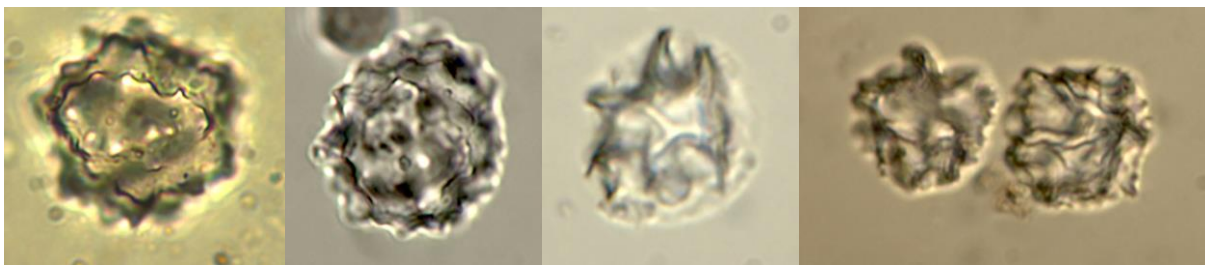

Katharina Neumann

Katharina Neumann

Katharina Neumann

Katharina Neumann

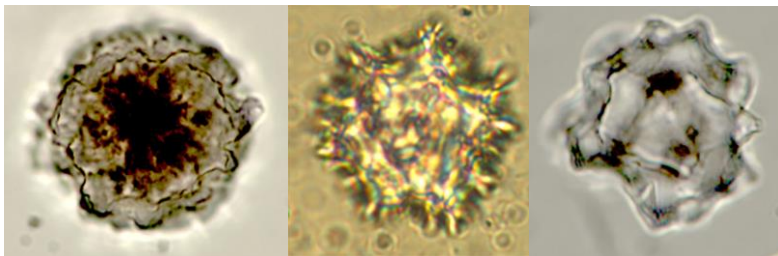

Katharina Neumann

Katharina Neumann

Katharina Neumann

**psilate:** having a smooth surface

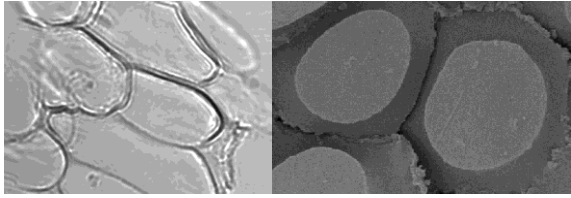

Oman Data Base

Barbara Eichhorn

**rugose:** covered with an irregular pattern of lines, ridges, or furrows on a planar surface; cf. plicate, striate

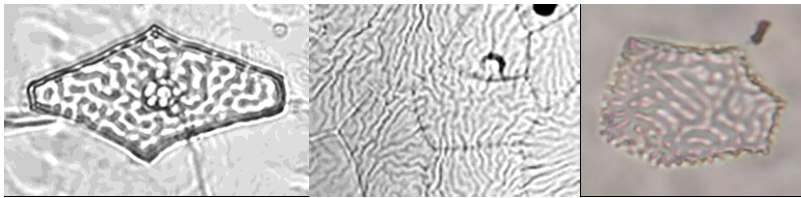

Oman Data Base

Oman Data Base

Aline Emery-Barbier

**scrobiculate:** pitted, evenly to unevenly, densely to sparsely

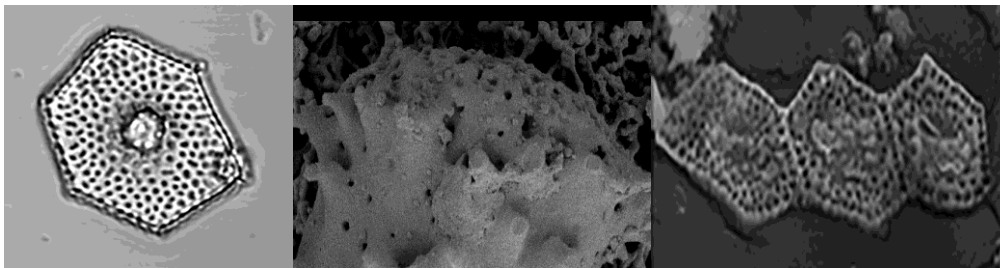

Oman Data Base

Barbara Eichhorn

Doreen Bowdery

**striate:** having lines or shallow furrows/ridges in a parallel pattern; cf. rugose

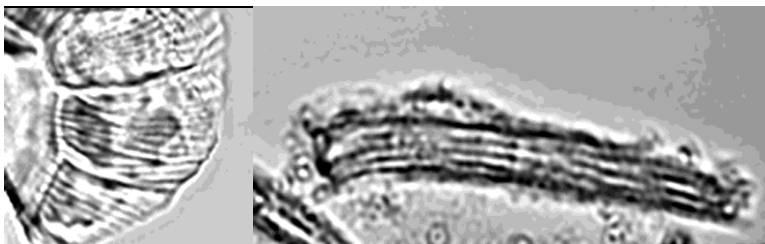

Oman Data Base

Oman Data Base

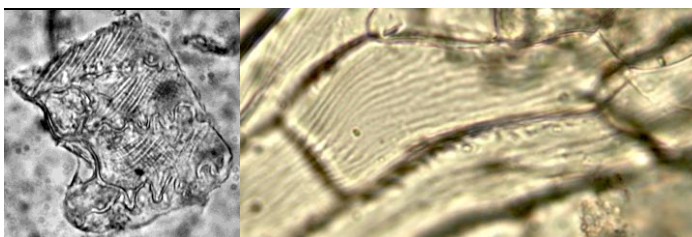

Aline Emery-Barbier

Katharina Neumann

**tuberculate:** covered with rounded and tapering protrusions; cf. nodulate, gibbate, verrucate

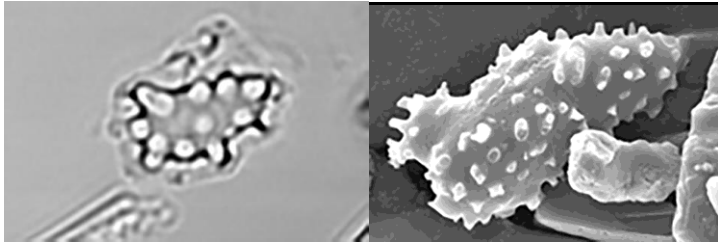

Oman Data Base

Doreen Bowdery

**verrucate:** having irregular shaped, wart-like processes; cf. tuberculate, nodulate,

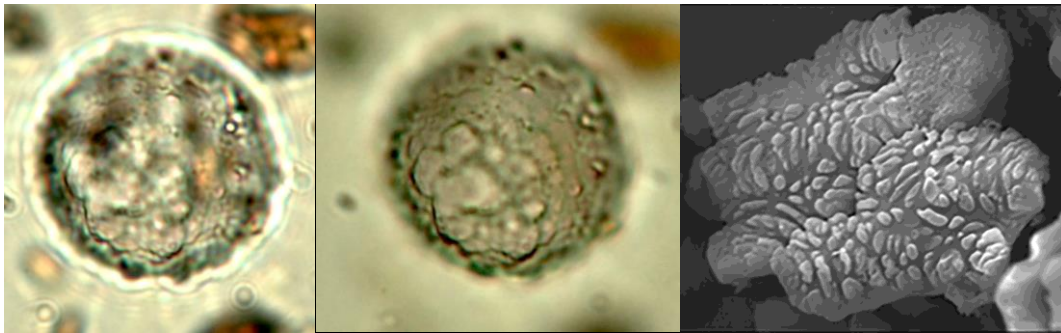

Katharina Neumann

Katharina Neumann

Doreen Bowdery

## Internal Material Texture Descriptors

The internal material texture refers to the (internal) microstructure (texture) of the silica that makes up phytoliths, as opposed to the texture of the surface of the phytolith. Although certain morphotypes display substantial variation in the internal material texture among or even within species, others tend to have fairly consistent, and diagnostic material texture. Examples include the homogeneous, translucent silica with a single organic inclusion characteristic of GSSCPs, or the homogeneous obscure to maculose silica typical of ACUTE BULBOSIS. Material texture is usually only visible in bright-field microscopy - not in SEM or with Differential Interference Contrast (Nomarski) microscopy - and most readily at high (1,000x) magnification and when focusing up and down through the phytolith.

**granular:** composed of minute spheroids or grains; cf. granulate (surface)

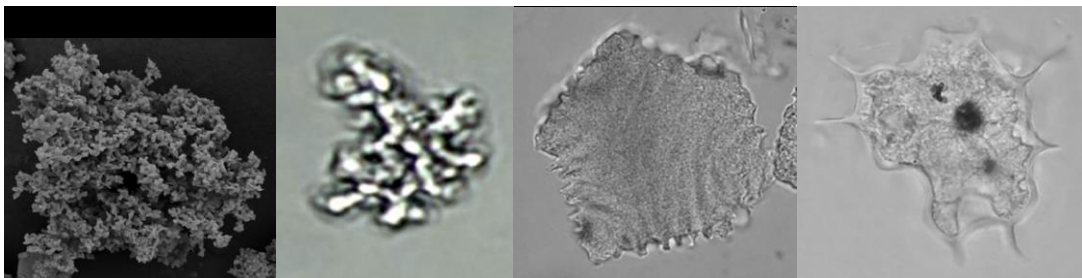

Katharina Neumann

Katharina Neumann

Caroline Strömberg

Caroline Strömberg

**homogeneous:** no visible material texture (at 1,000x magnification). May be translucent (glass-like), opaline (opaque but light-colored, “milky”), or obscure (dark)

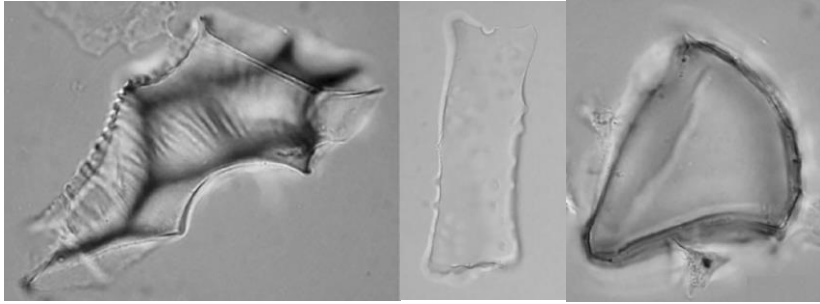

Caroline Strömberg

Caroline Strömberg

Caroline Strömberg

**laminar:** consisting of sub-micron, parallel layers of silica. Lamina can be straight, concentric, or irregular; cf. striated

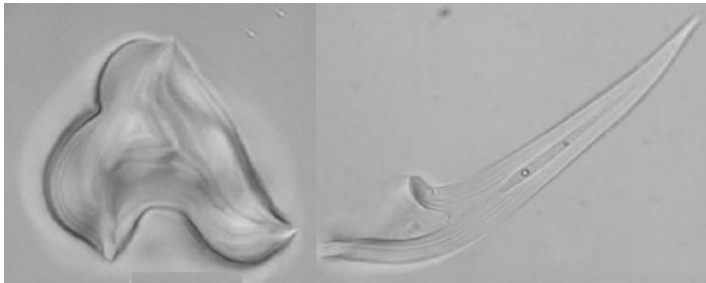

Caroline Strömberg

Caroline Strömberg

**maculose:** containing abundant, dark spots (presumably occluded organic material); cf. homogeneous obscure

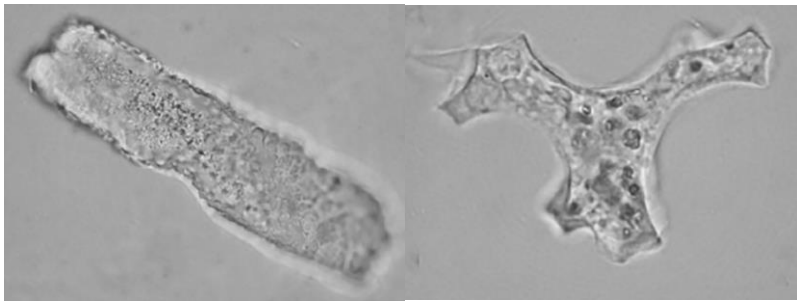

Caroline Strömberg

Caroline Strömberg



## General Descriptors

**abaxial:** away from the axis or center

**abnormal:** departing from the usual

**acentric:** off center

**adaxial;** towards the axis or center

**articulated:** having two or more discrete phytolith “units” (often corresponding to a cell) joined together or attached

**castula:** waist, the narrow part in between lobes, of a GSSCP

**compressed:** flattened lengthwise

**concave:** curved inward

**convex:** curved outward

**crassus:** stout, thick

**dense:** closely spaced or compacted together

**extended:** stretched out, made longer or wider

**gracile:** slender, thin

**GSSCP:** Grass Silica Short Cell Phytolith

**hollow:** phytolith consisting of an outer (cell) wall or margin that is silicified, but with a center that is not

**infilled/infilling:** when the interior of a cell has been silicified, resulting in a solid, 3-D phytolith

**irregular:** without regular arrangement or distinguishable pattern or shape

**isolated:** separated from other phytoliths or plant tissue

**lumen:** the central cavity of a hollow structure or cell

**margin:** edge

**ornate:** having one or many types of ornamentation, such as a combination of surface textures and/or processes and transitional forms thereof

**process:** a protuberance, a 3-D projection (see below)

**projection:** a small structure that extends outward from a typically much larger structure; 2-D or 3-D

**quadratic:** shaped like a square, with four  $\pm$  equal sides

**radiating:** to spread from a central point

**rectilinear:** straight, or consisting of straight lines

**regular:** conforming in arrangement, symmetrical, recurring at fixed intervals, orderly

**rounded:** having an overall curved surface

**solid:** being completely silicified, creating a non-porous structure/phytolith; cf. infilled/infilling

**sparse:** thinly scattered or distributed, widely spaced, dispersed

**truncated:** abruptly shortened or cut off

## Alphabetical List of All Descriptors

For GSSCP Descriptors see SI Morphotype Descriptions

| Term        | Category           | Term               | Category           | Term         | Category           |
|-------------|--------------------|--------------------|--------------------|--------------|--------------------|
| abaxial     | General            | elongated          | 2-D                | papillar     | Surf. text. & orn. |
| abnormal    | General            | end                | GSSCP              | pilate       | Surf. text. & orn. |
| acentric    | General            | end view           | GSSCP              | planar view  | GSSCP              |
| acicular    | 3-D                | entire             | margin             | plicate      | Surf. text. & orn. |
| acute       | 2-D                | extended           | General            | polygonal    | 2-D                |
| adaxial     | General            | facetate           | Surf. text. & orn. | polyhedral   | 3-D                |
| amoeboid    | 3-D                | flabellate         | 2-D                | prismatic    | 3-D                |
| annulate    | Surf. text. & orn. | fusiform           | 2-D                | process      | General            |
| arcuate     | 2-D                | geniculate         | 2-D                | projection   | General            |
| areolate    | Surf. text. & orn. | gibbate            | Surf. text. & orn. | psilate      | Surf. text. & orn. |
| articulated | General            | gracile            | General            | quadratic    | General            |
| baculate    | Surf. text. & orn. | granular           | Int. mat. text     | radiating    | General            |
| brachiate   | 2-D                | granulate          | Surf. text. & orn. | rectangular  | 2-D                |
| bulbous     | 3-D                | GSSCP              | General            | rectilinear  | General            |
| carinate    | 3-D                | helical            | Surf. text. & orn. | regular      | General            |
| castellate  | margin             | hollow             | General            | reniform     | 2-D                |
| castula     | General            | homogeneous        | Int. mat. text     | rounded      | General            |
| cavate      | 3-D                | infilled/infilling | General            | rugose       | Surf. text. & orn. |
| circular    | 2-D                | IPS                | GSSCP              | scrobiculate | Surf. text. & orn. |
| clavate     | margin             | IPS view           | GSSCP              | side         | GSSCP              |
| claviform   | 3-D                | irregular          | General            | side view    | GSSCP              |
| columnar    | margin             | isolated           | General            | sinuate      | margin             |
| compound    | Surf. text. & orn. | laminar            | Int. mat. text     | solid        | General            |
| compressed  | General            | lobate             | 2-D                | sparse       | General            |
| concave     | General            | longitudinal       | GSSCP              | spheroidal   | 3-D                |
| conical     | 3-D                | lumen              | General            | striate      | Surf. text. & orn. |
| convex      | General            | maculose           | Int. mat. text     | tabular      | 3-D                |
| crassus     | General            | margin             | General            | transverse   | GSSCP              |
| crenate     | margin             | nodular            | 3-D                | trapeziform  | 2-D                |
| cylindrical | 3-D                | nodulate           | Surf. text. & orn. | truncated    | General            |
| dendritic   | margin             | oblong             | 2-D                | tuberculate  | Surf. text. & orn. |
| dense       | General            | OPS                | GSSCP              | uncinate     | 2-D                |
| dentate     | margin             | OPS view           | GSSCP              | velloate     | margin             |
| echinate    | Surf. text. & orn. | ornate             | General            | verrucate    | Surf. text. & orn. |
| ellipsoidal | 3-D                | ovate              | 2-D                |              |                    |

## Other Sources to Consult for Descriptors

**Bowdery D, Hart DM, Lentfer C, Wallis LA. 2001.** A universal phytolith key. In: Meunier J, Colin F (eds.), *Phytoliths: applications in earth sciences and human history*. Balkema, Lisse, pp. 267-278

**Kapp RO, Davis OK, King JE. 2000.** *Ronald O. Kapp's Pollen and Spores*. 2<sup>nd</sup> ed. USA: American Association of Stratigraphic Palynologists Foundation.

**Moore PD, Webb JA. 1978.** *An Illustrated Guide to Pollen Analysis*. London: Hodder and Stoughton.

**Moore PD, Webb JA, Collinson ME. 1991.** *Pollen Analysis*. Oxford: Blackwell Scientific Publications.

**Murley MR. 1951.** Seeds of the Cruciferae of Northeastern North America. *The American Midland Naturalist*, 46:1-81.

**Punt W, Hoen PP, Blackmore S, Nilsson S, Le Thomas A. 2007.** Glossary of pollen and spore terminology. *Review of Palaeobotany and Palynology*, 143(1):1-81.

**Stearn WT. 2004.** *Botanical Latin*, 4<sup>th</sup> ed. Portland, OR: Timber Press.

**The International Code for Starch Nomenclature. 2011.** Access at: <http://fossilfarm.org/ICSN/Code.html>
